# Supplementary material for: F-box protein FBXO30 mediates retinoic acid receptor γ ubiquitination and regulates BMP signaling in neural tube defects
Source: PubMed Central journal article supplement (PMC6639381; doi:10.1038/s41419-019-1783-y), 2019-07-18
Supplement: 41419_2019_1783_MOESM1_ESM.pdf [file 41419_2019_1783_MOESM1_ESM.pdf]

# Supp Figure 1

**A**

## GO-Standard

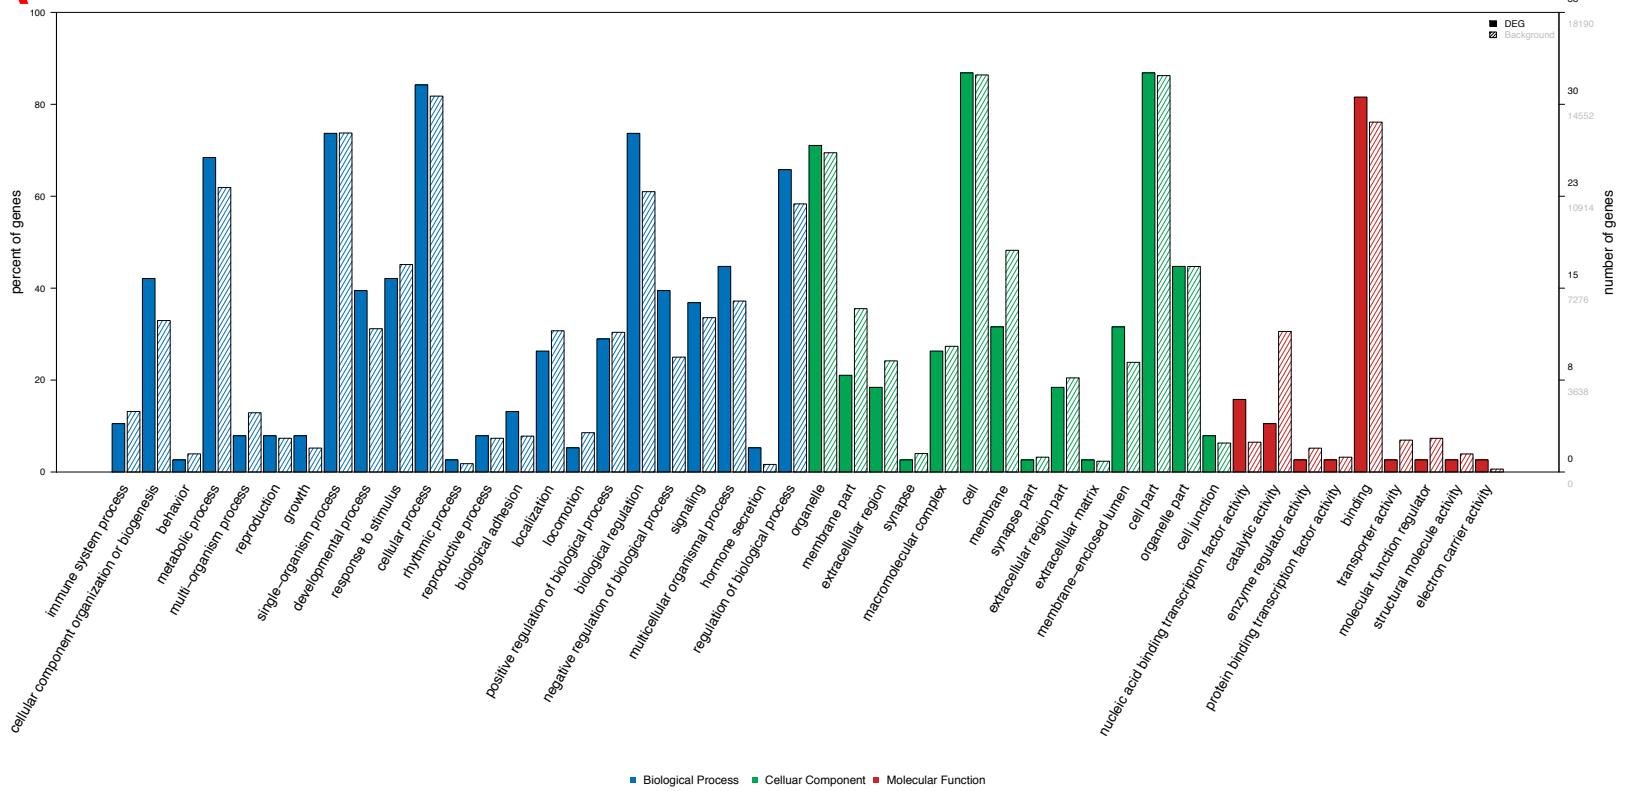

**B**

## Statistics of Pathway Enrichment

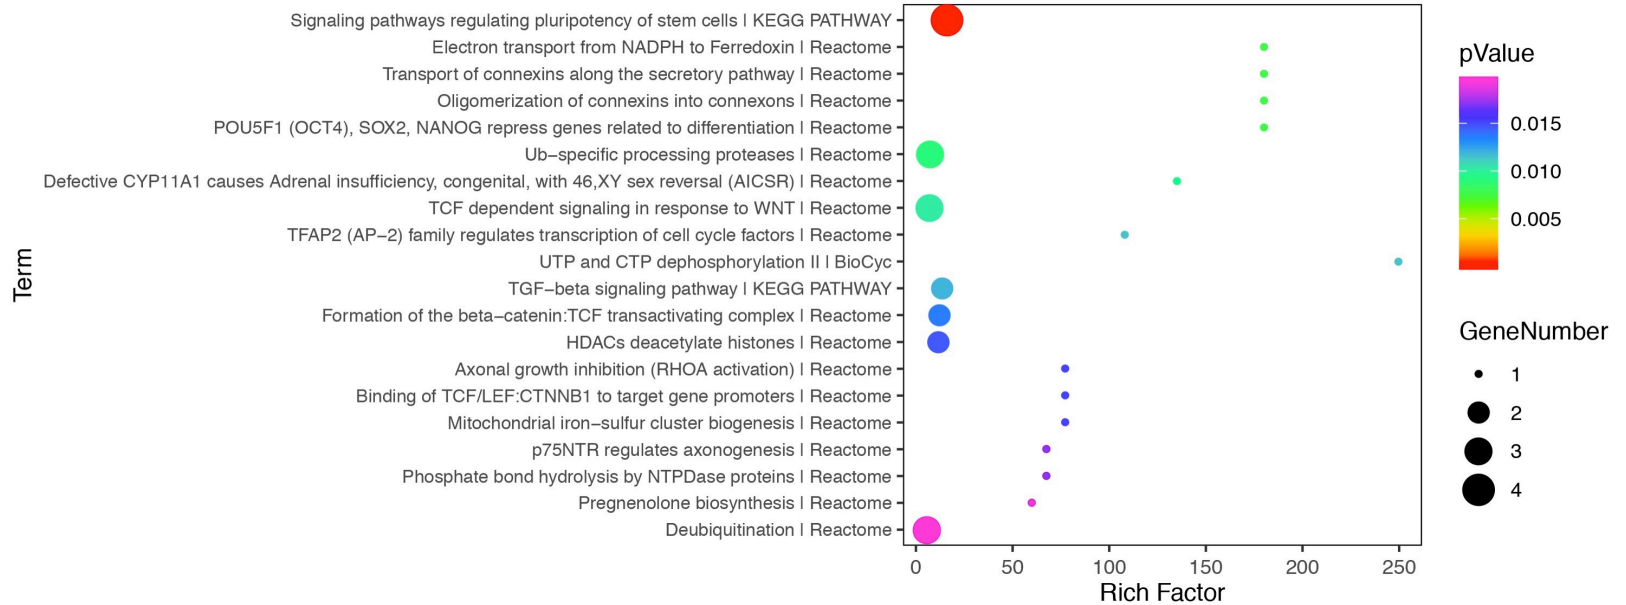

**C**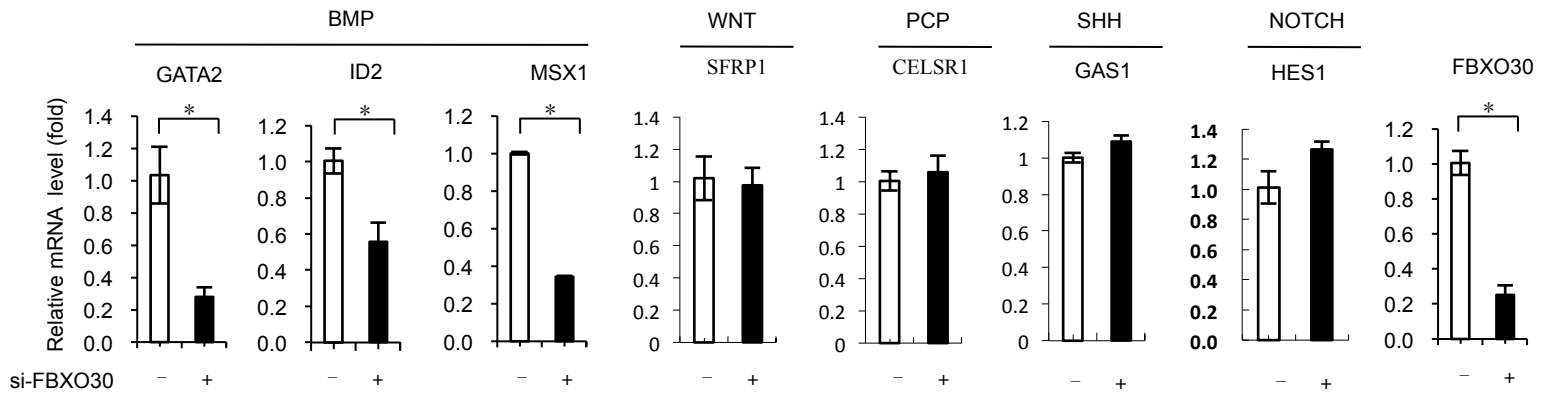**D**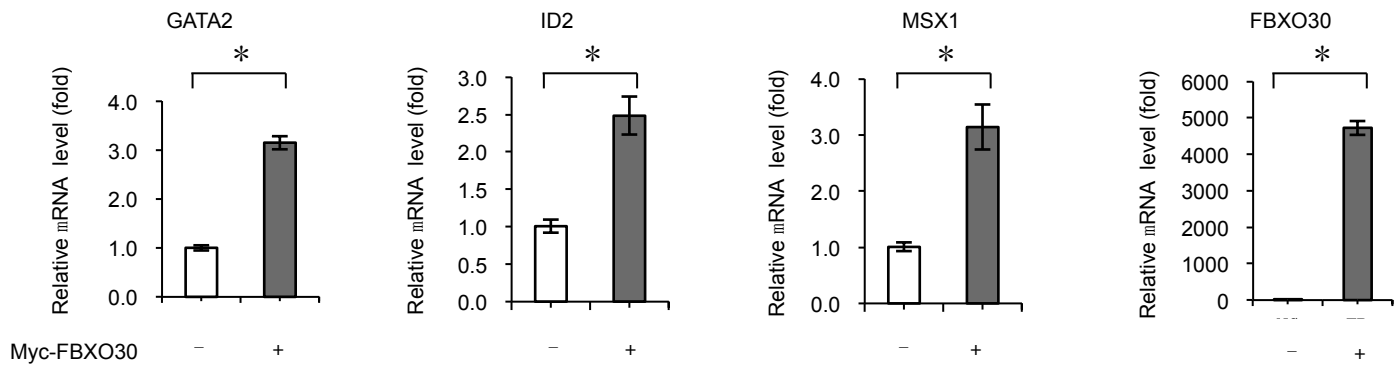

# Supp Figure 2

**A**

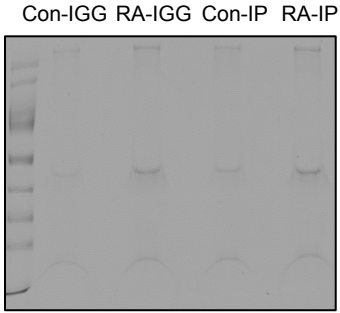

**B**

| UniProtKB AC/ID | gene symbol | LFQ intensity IP |
|-----------------|-------------|------------------|
| Q8BJL1          | FBXO30      | 1133200          |

**C**

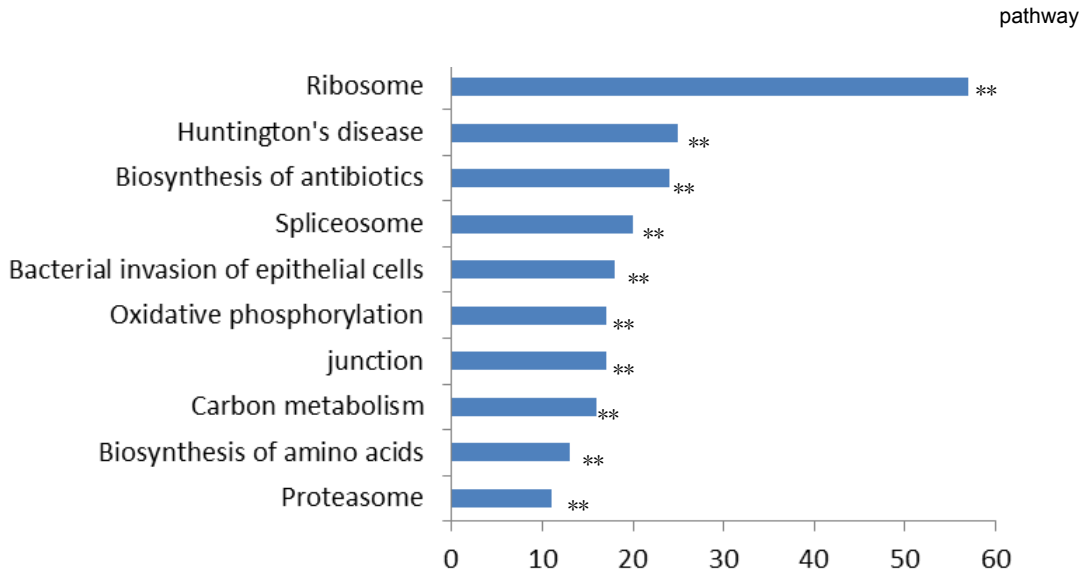

**D**

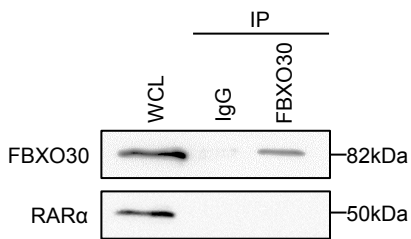

**E**

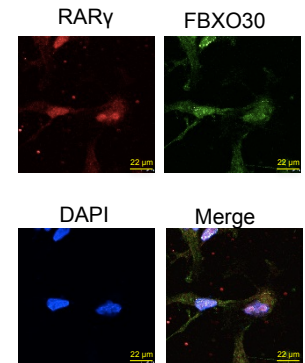

**NT2**

**F**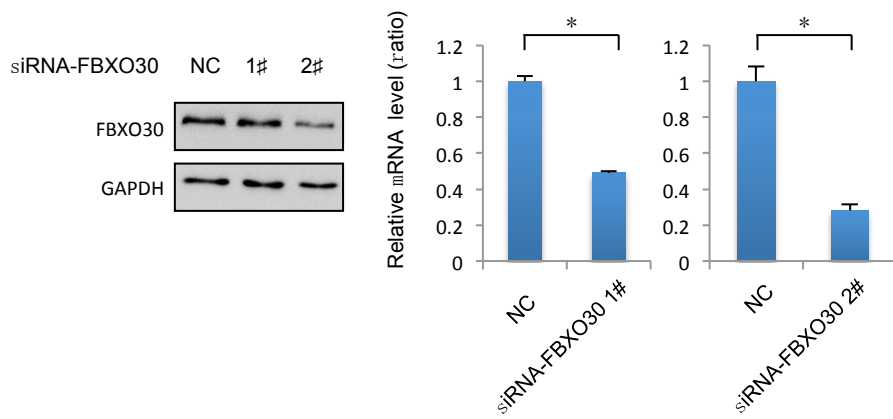**G**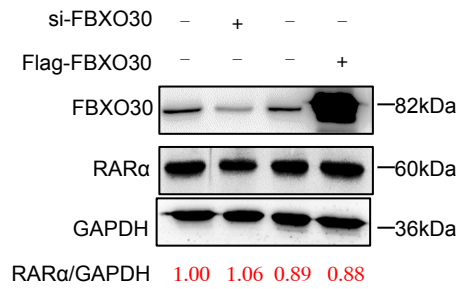**H**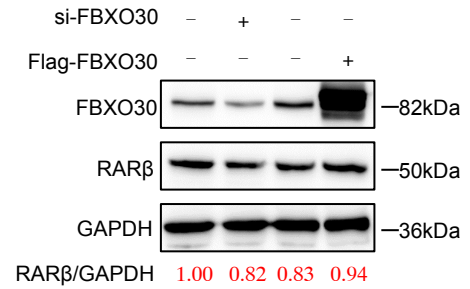**Supp Figure 3****A**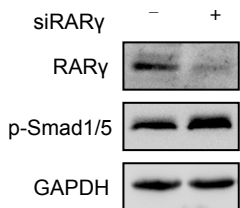**B**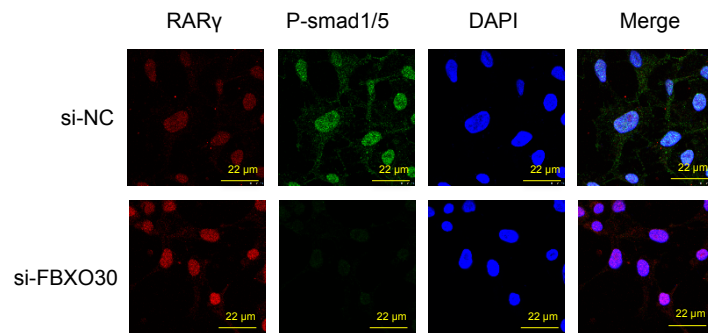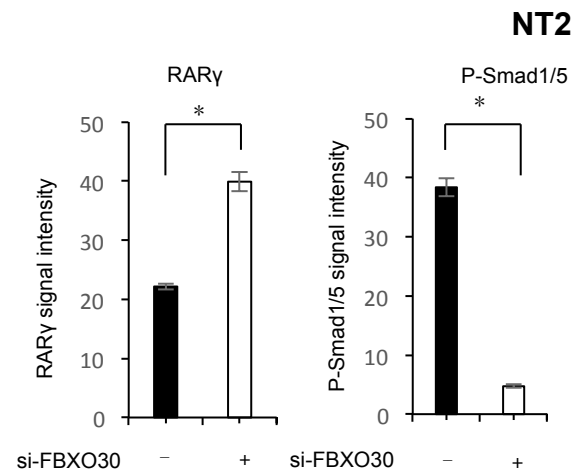

# Supp Figure 4

**A**

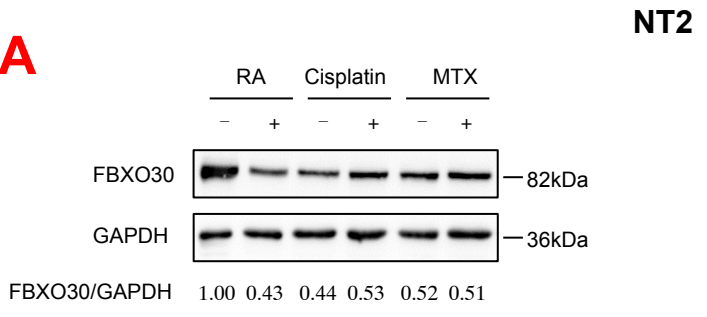

**B**

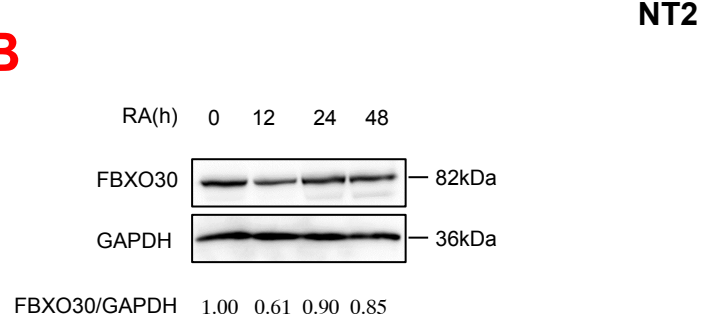

**C**

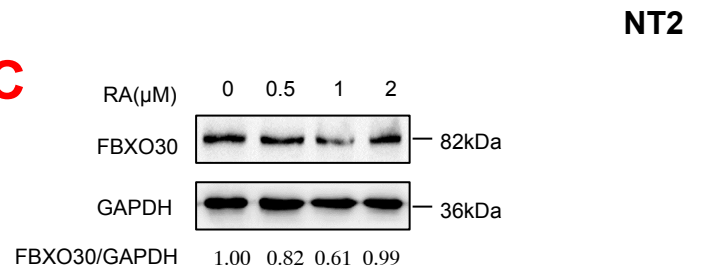

**D**

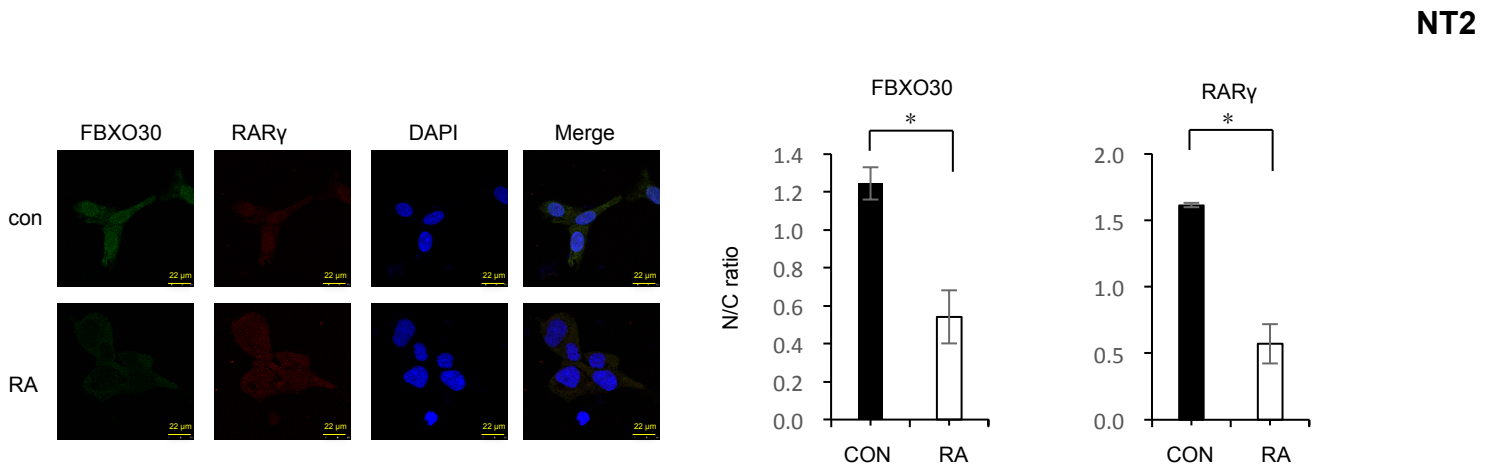

# Supp Figure 5

## A

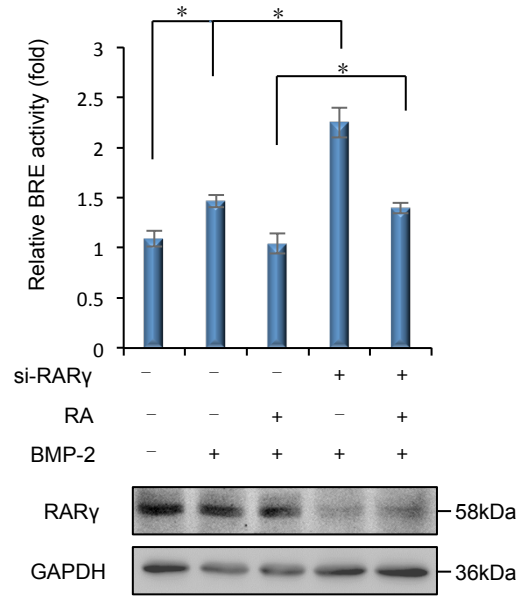

## B

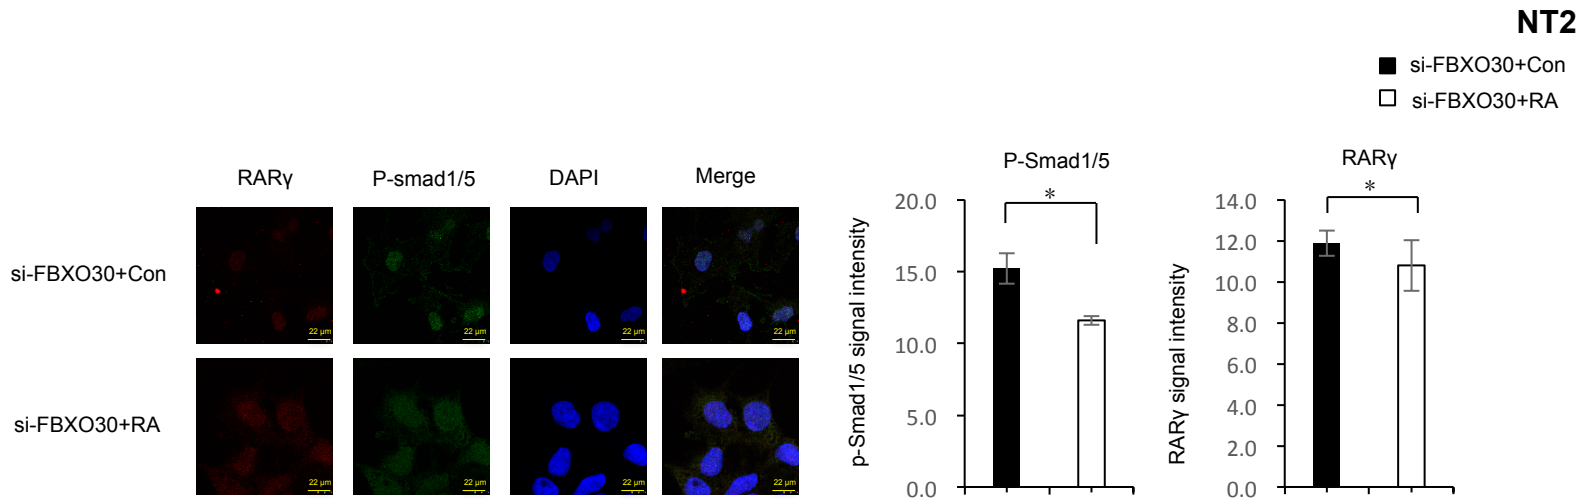

# Supp Figure 6

E10.5

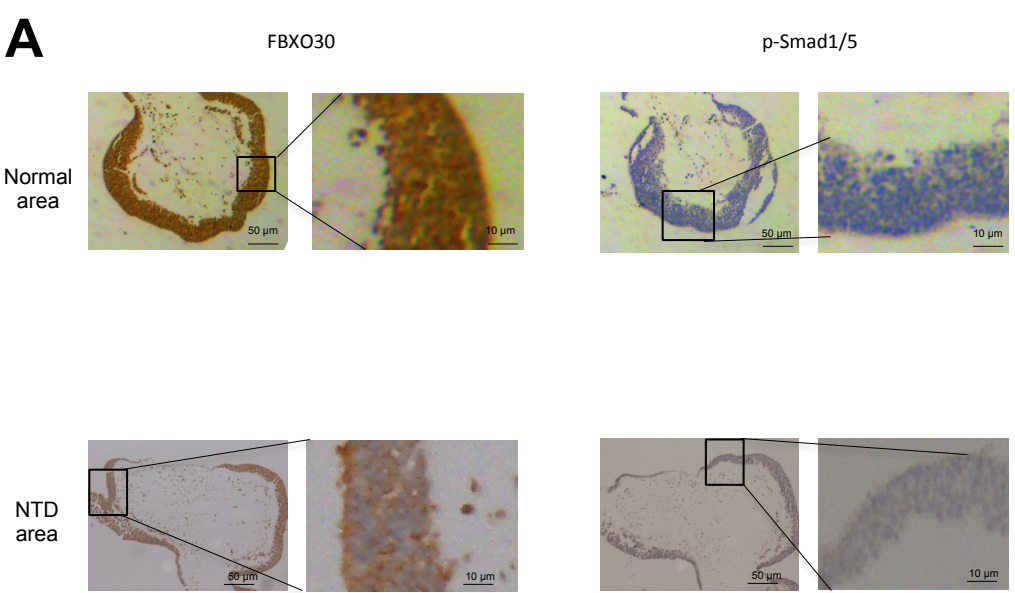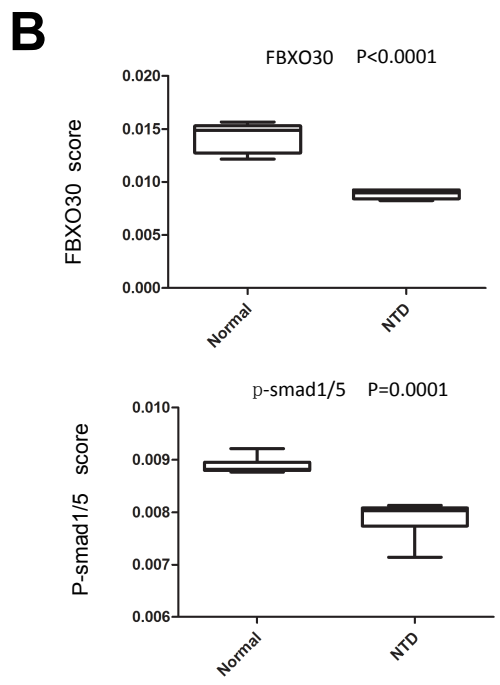

# Supp Figure 7

n=10

## BMP receptors

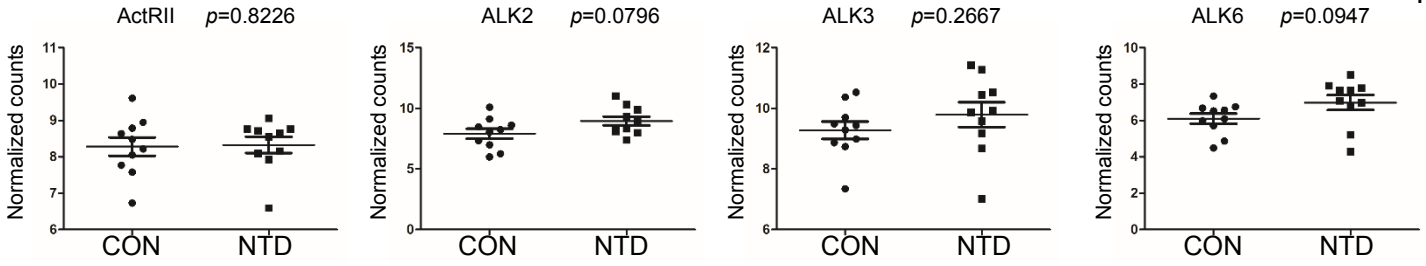

## BMP ligands

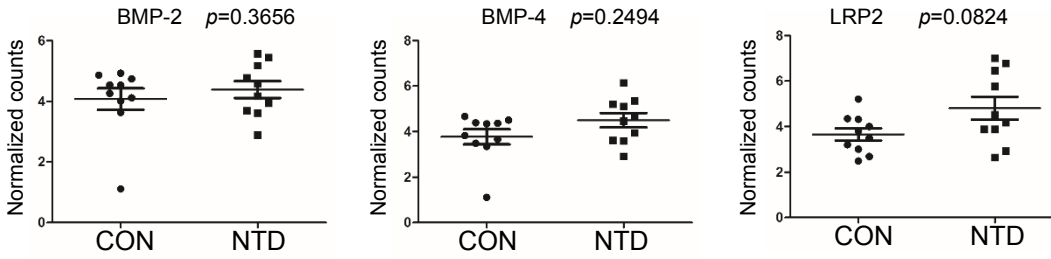

## BMP inhibitors



## BMP target genes

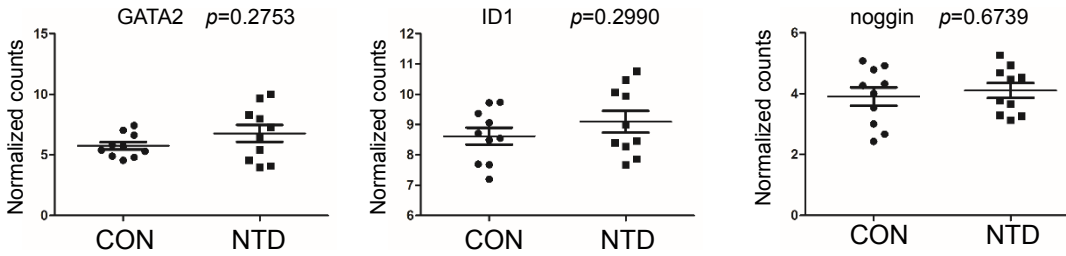

## Smad family

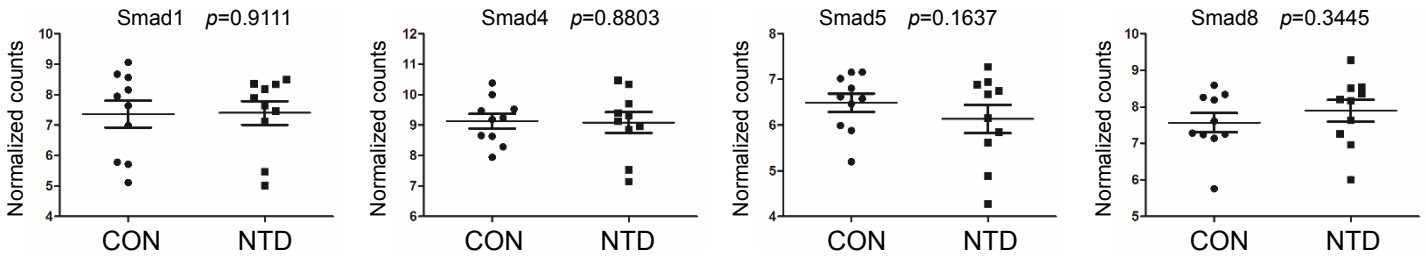



# Scan blot Supp Figure 8

## Figure 2

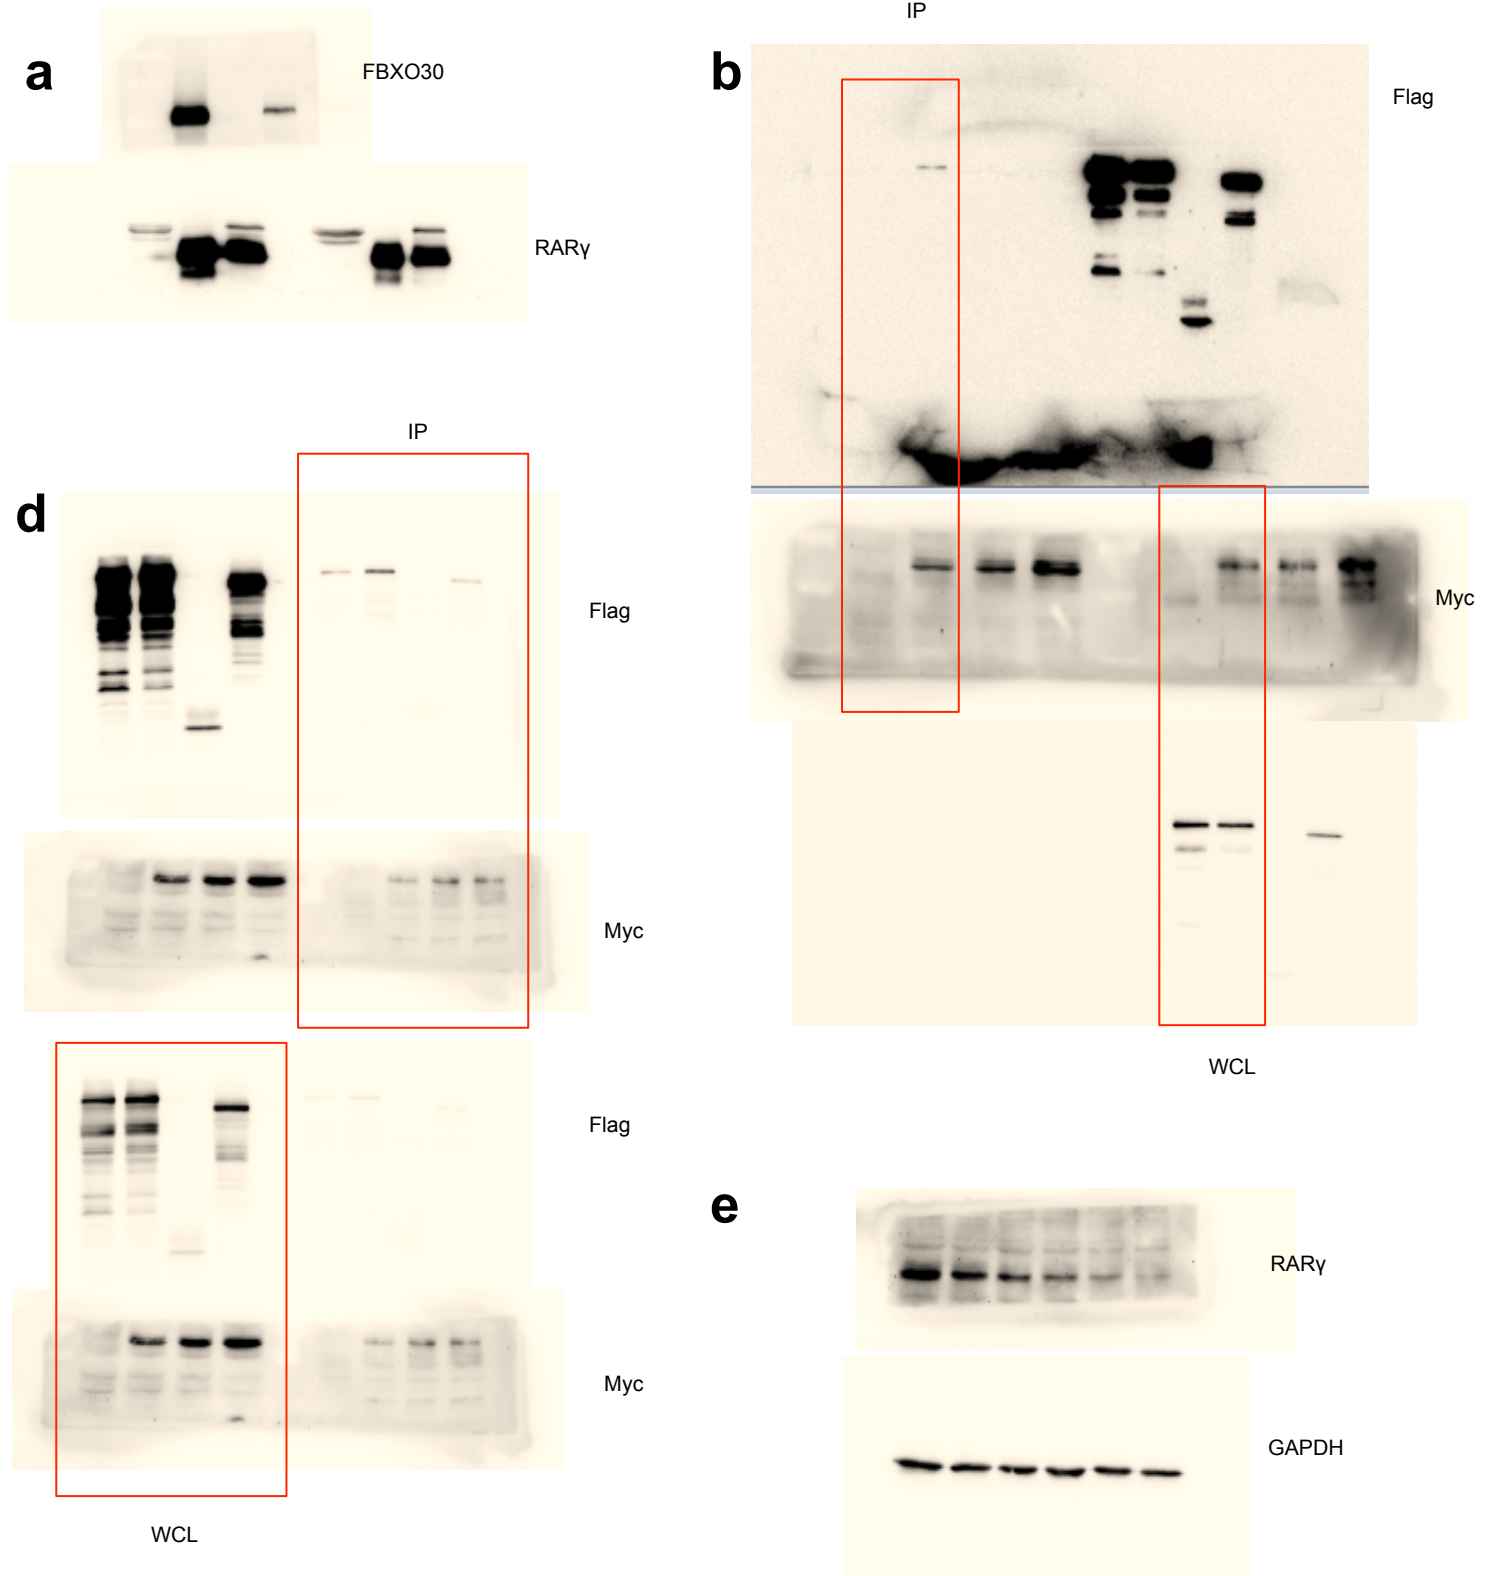

# Figure 2

**f**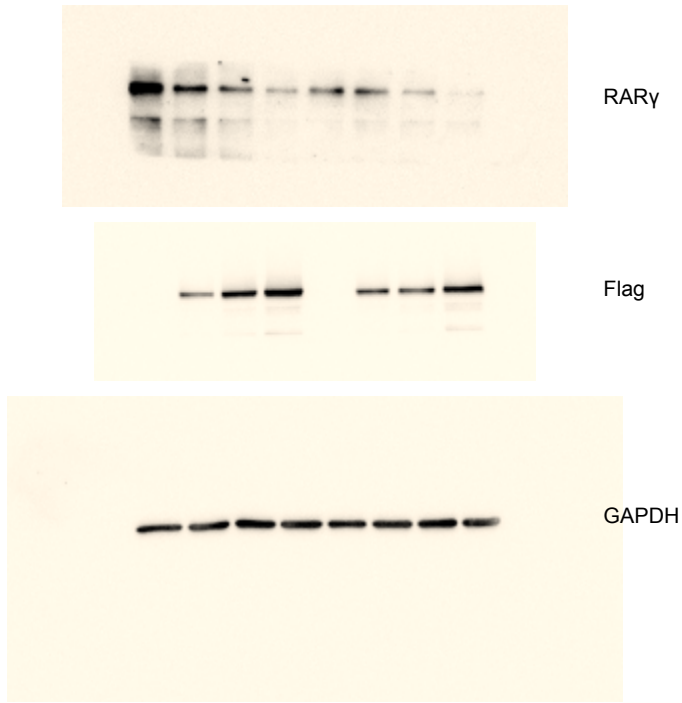**g**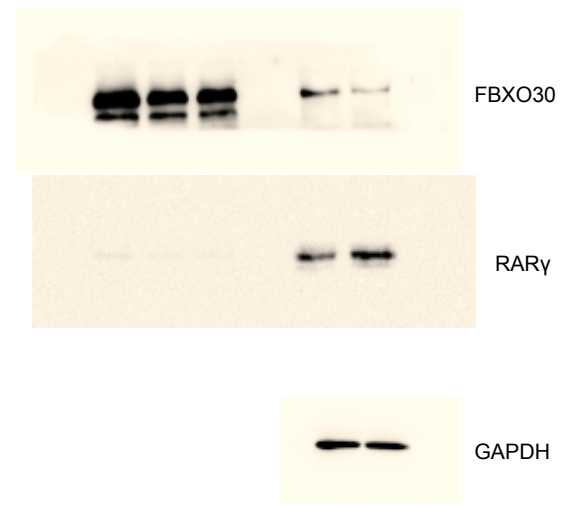**h**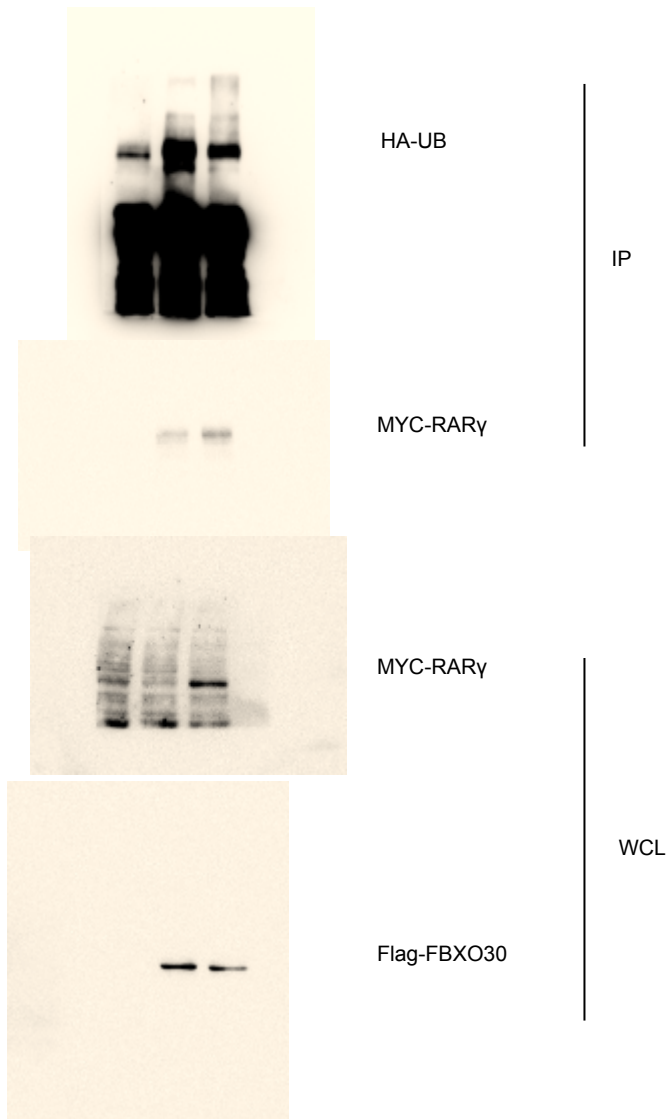**i**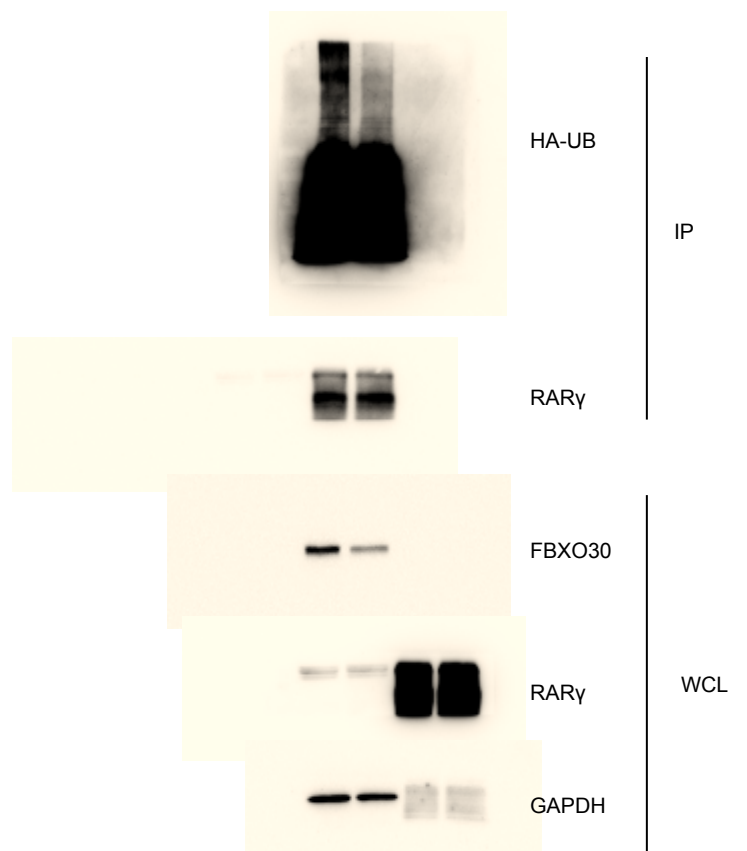

# Figure 3

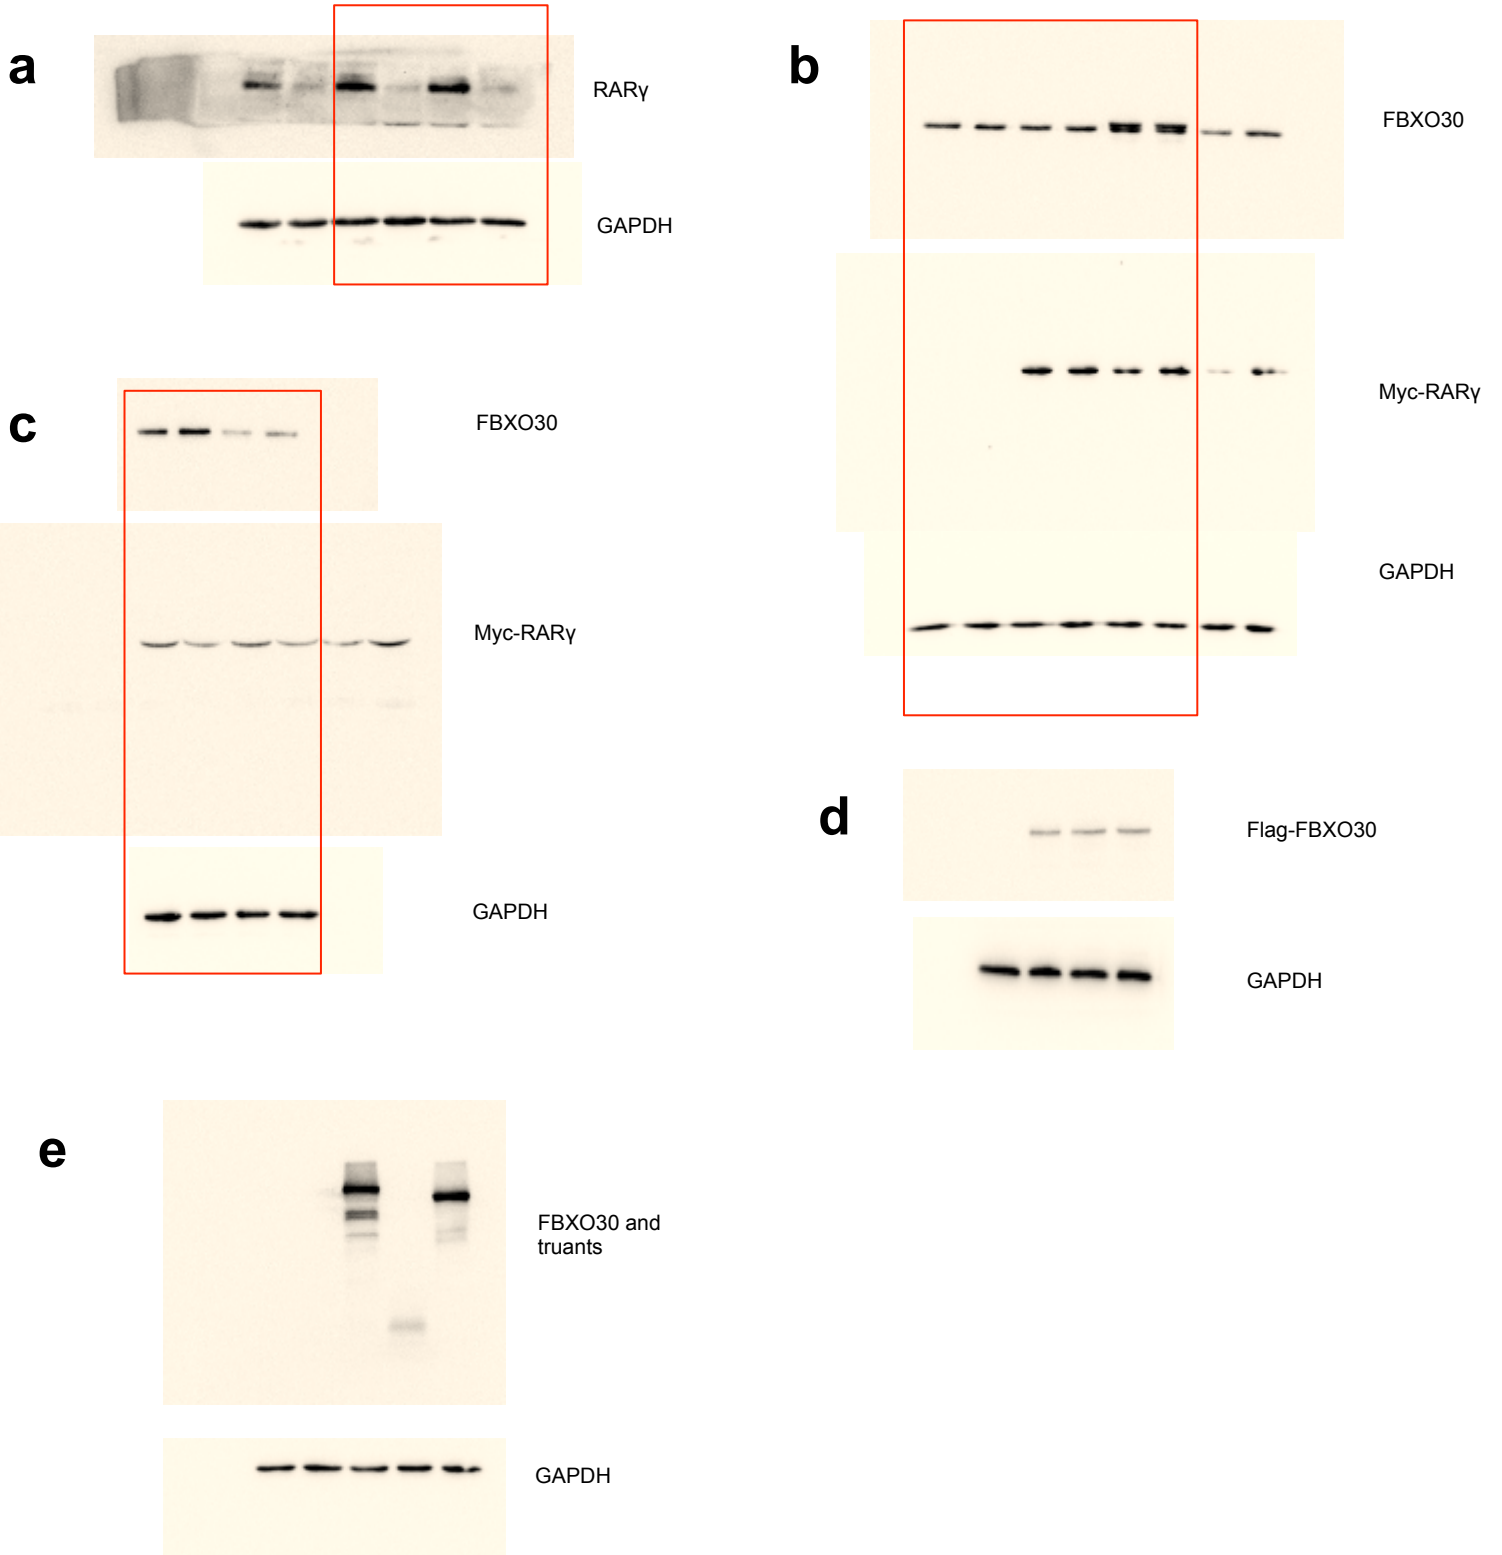

# Figure 3

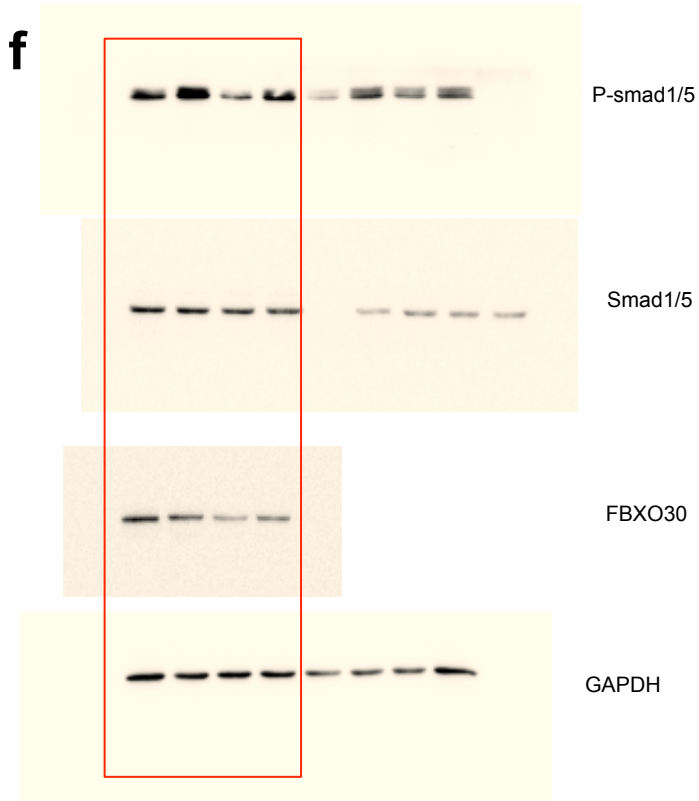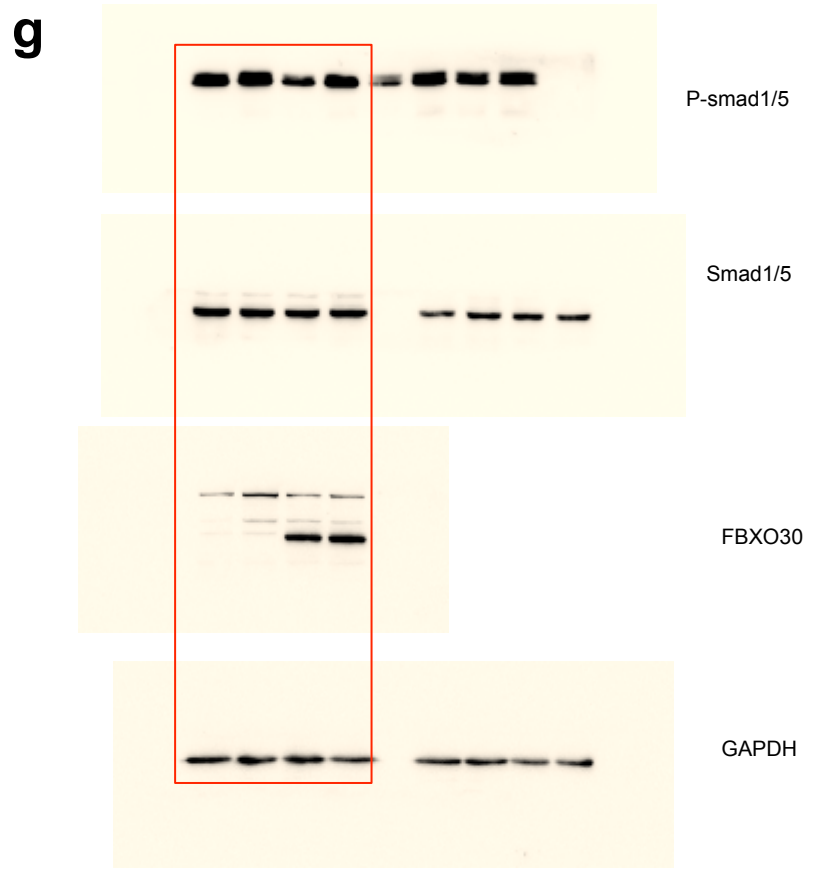

# Figure 4

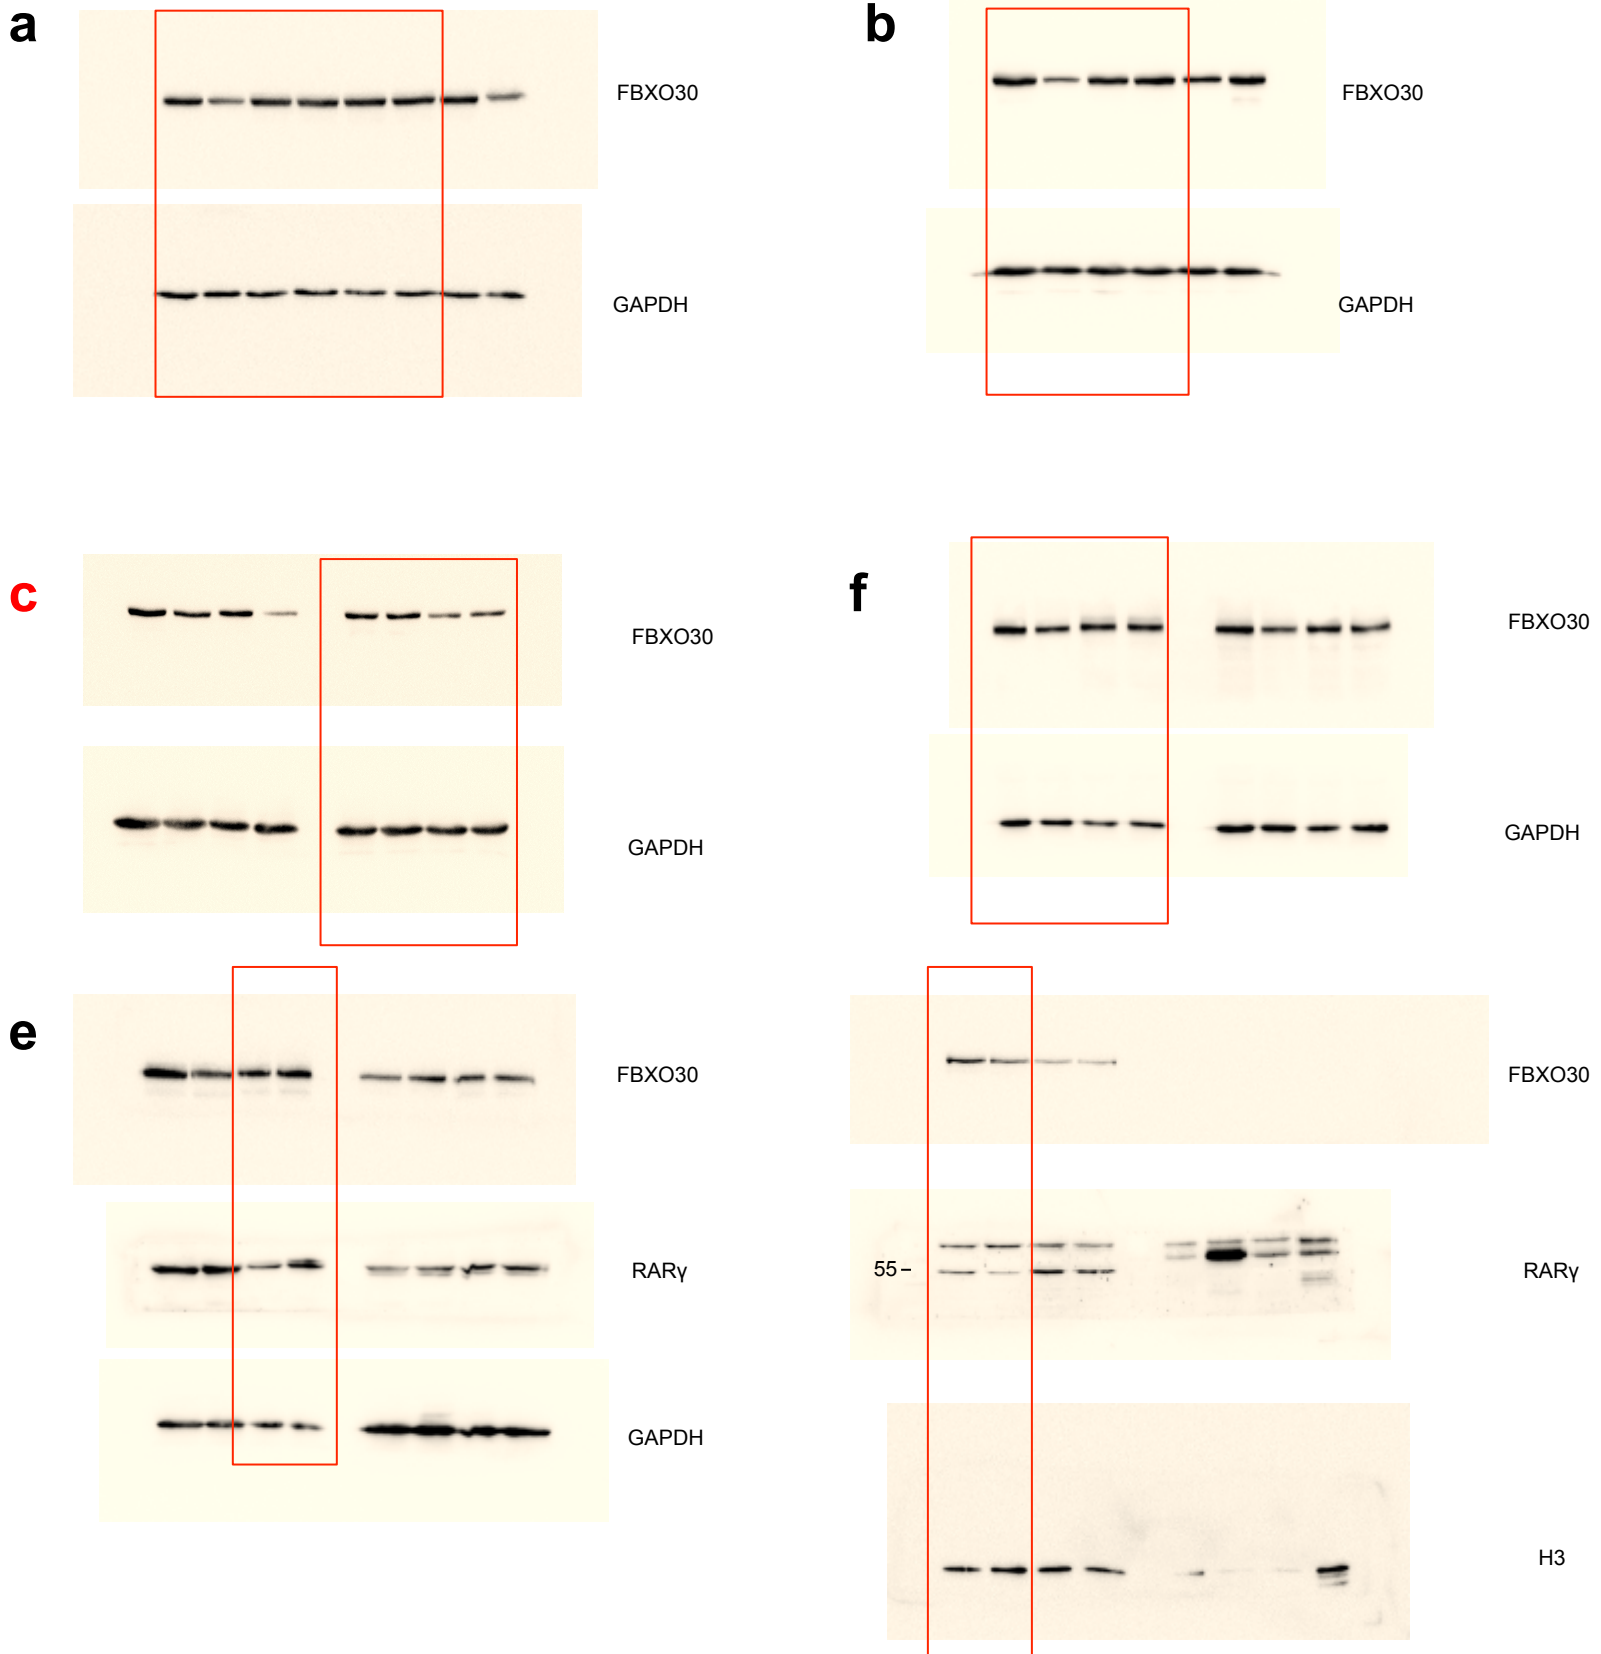

**Figure 4**

**g**

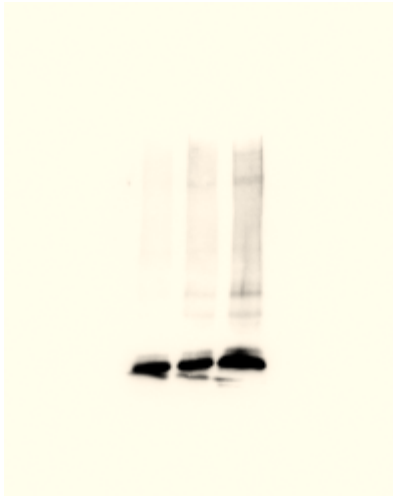

IB- HA

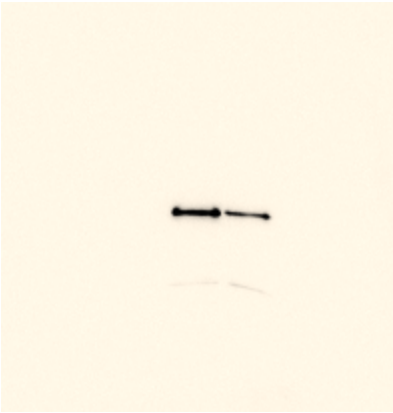

IB-Flag

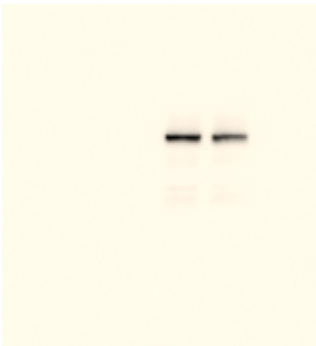

IB-Flag

WCL

IP-Flag

# Figure 5

**a**

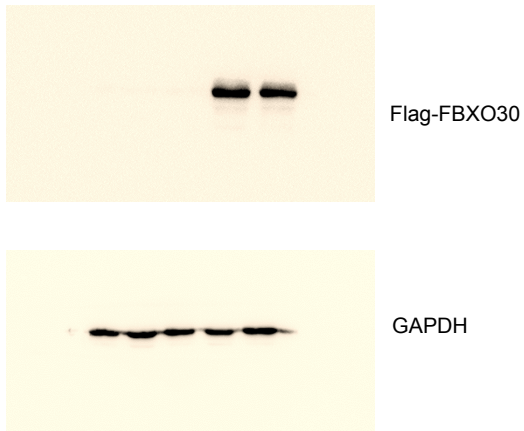

**b**

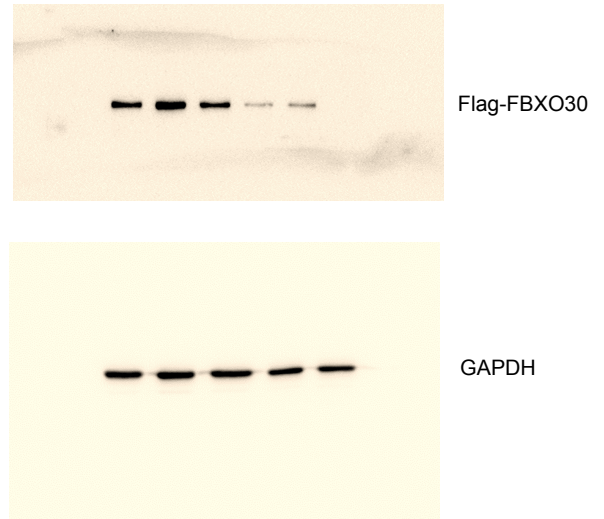

**c**

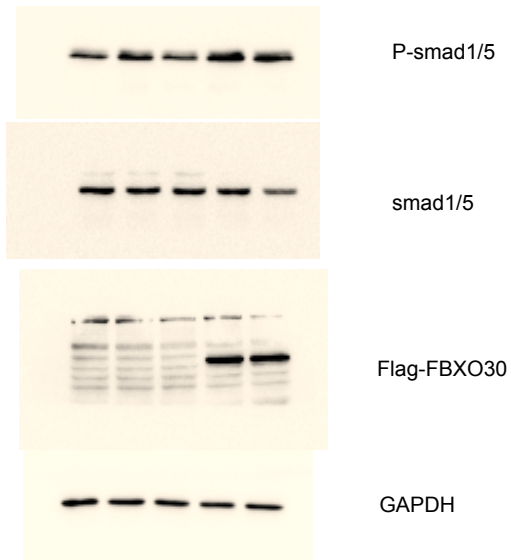

**d**

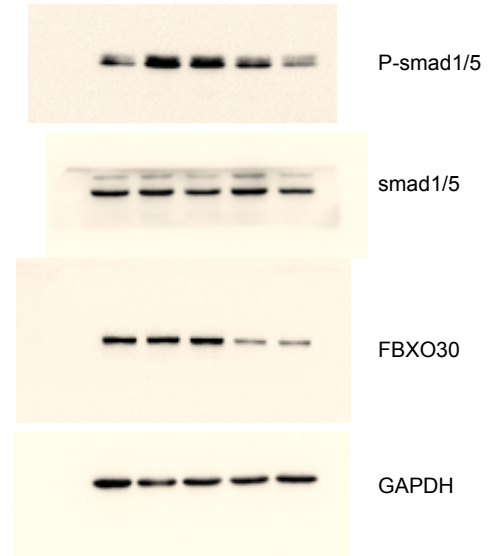

# Figure 6

**b**

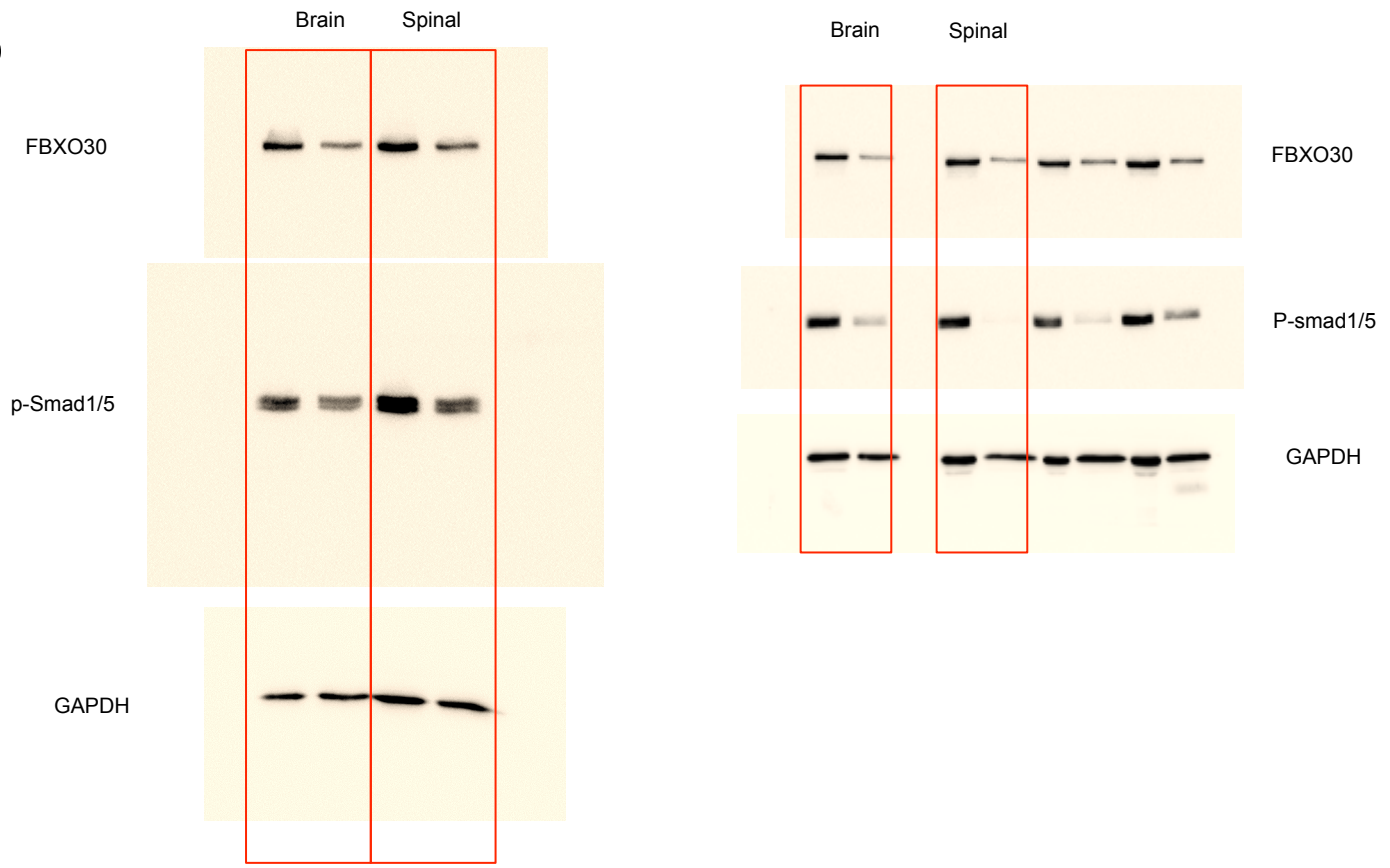



# Figure 7

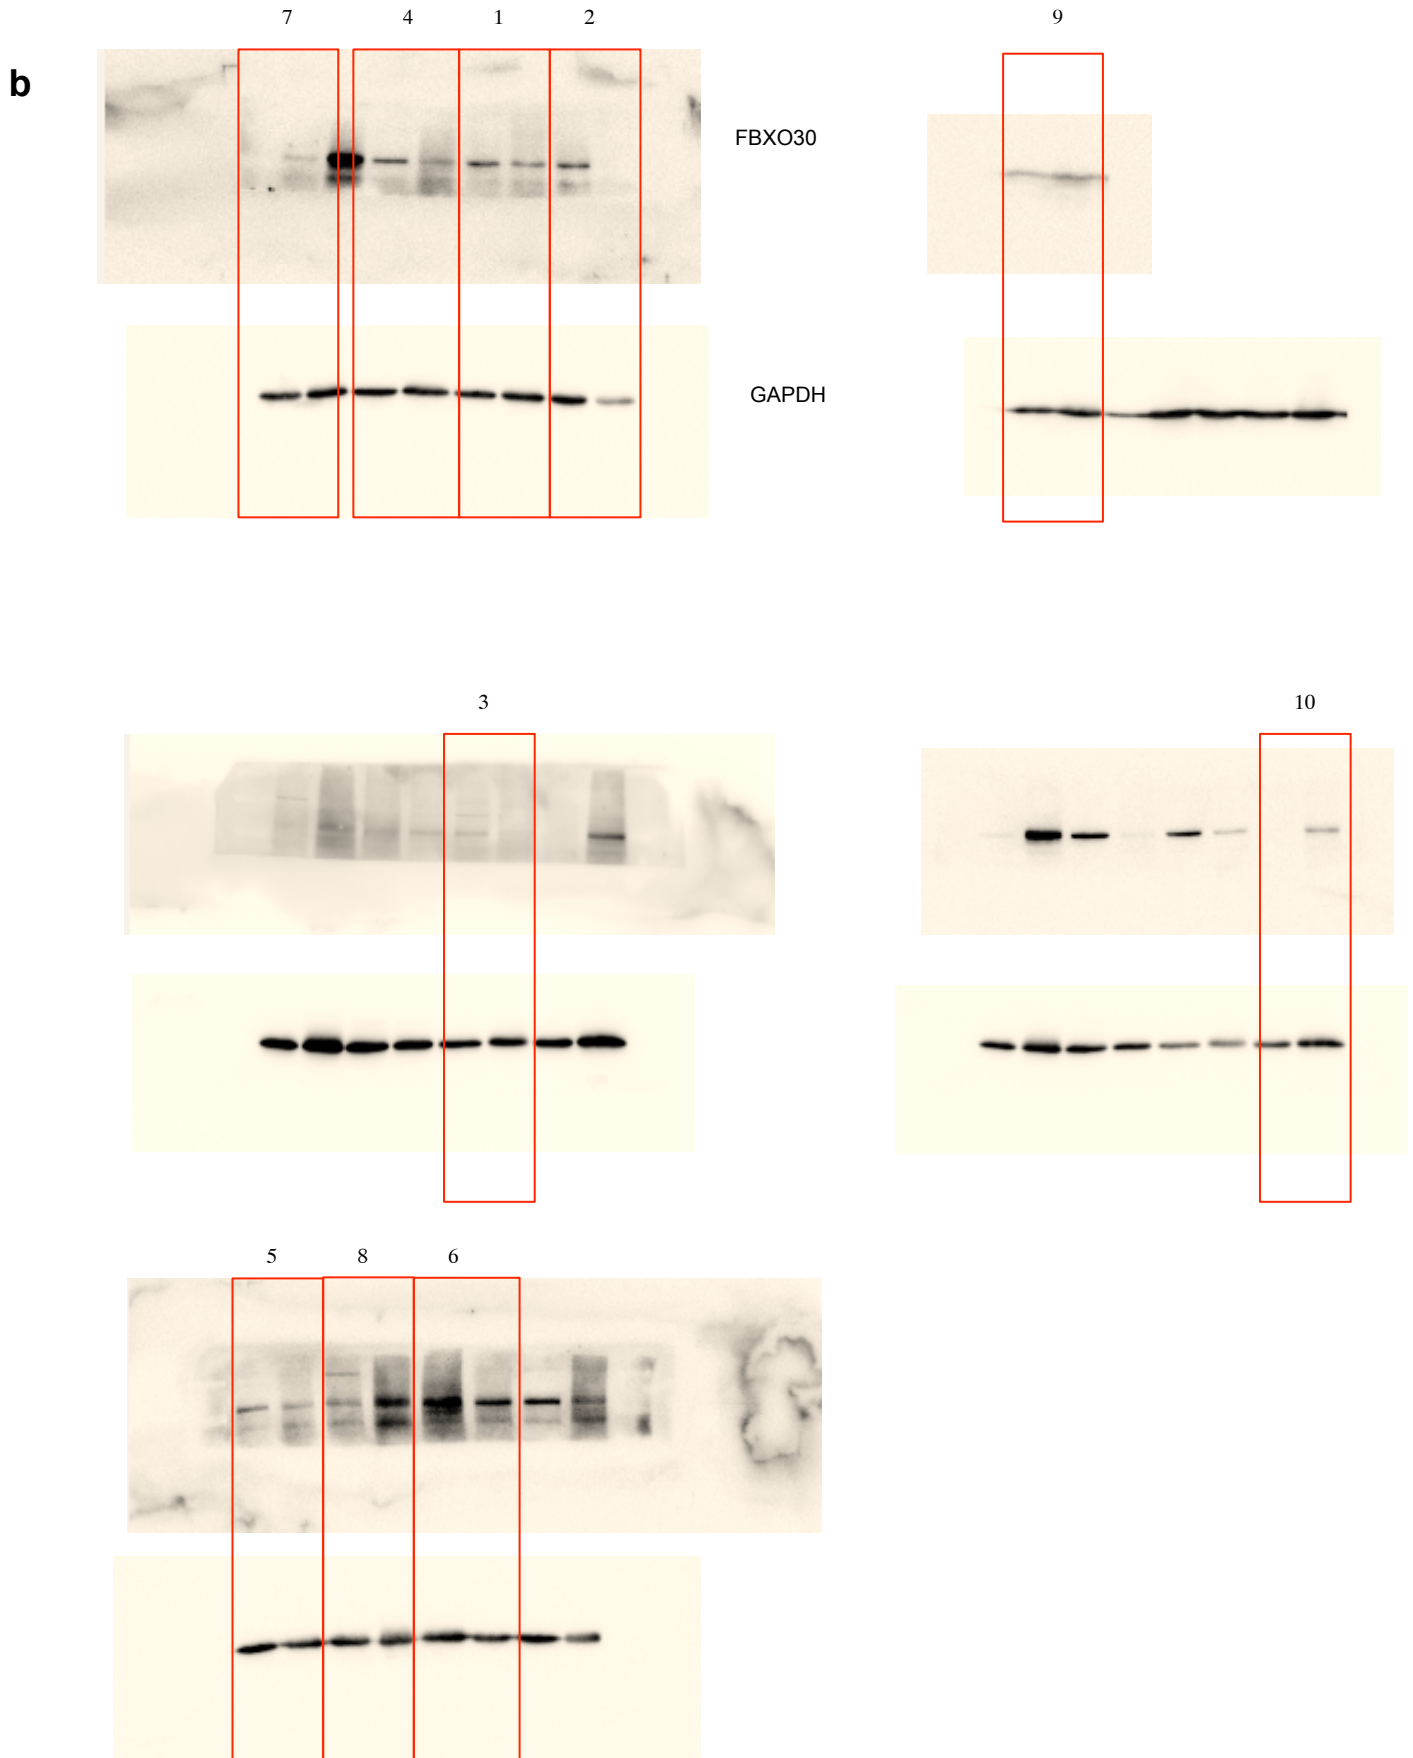

# Supp Figure 2

**d**

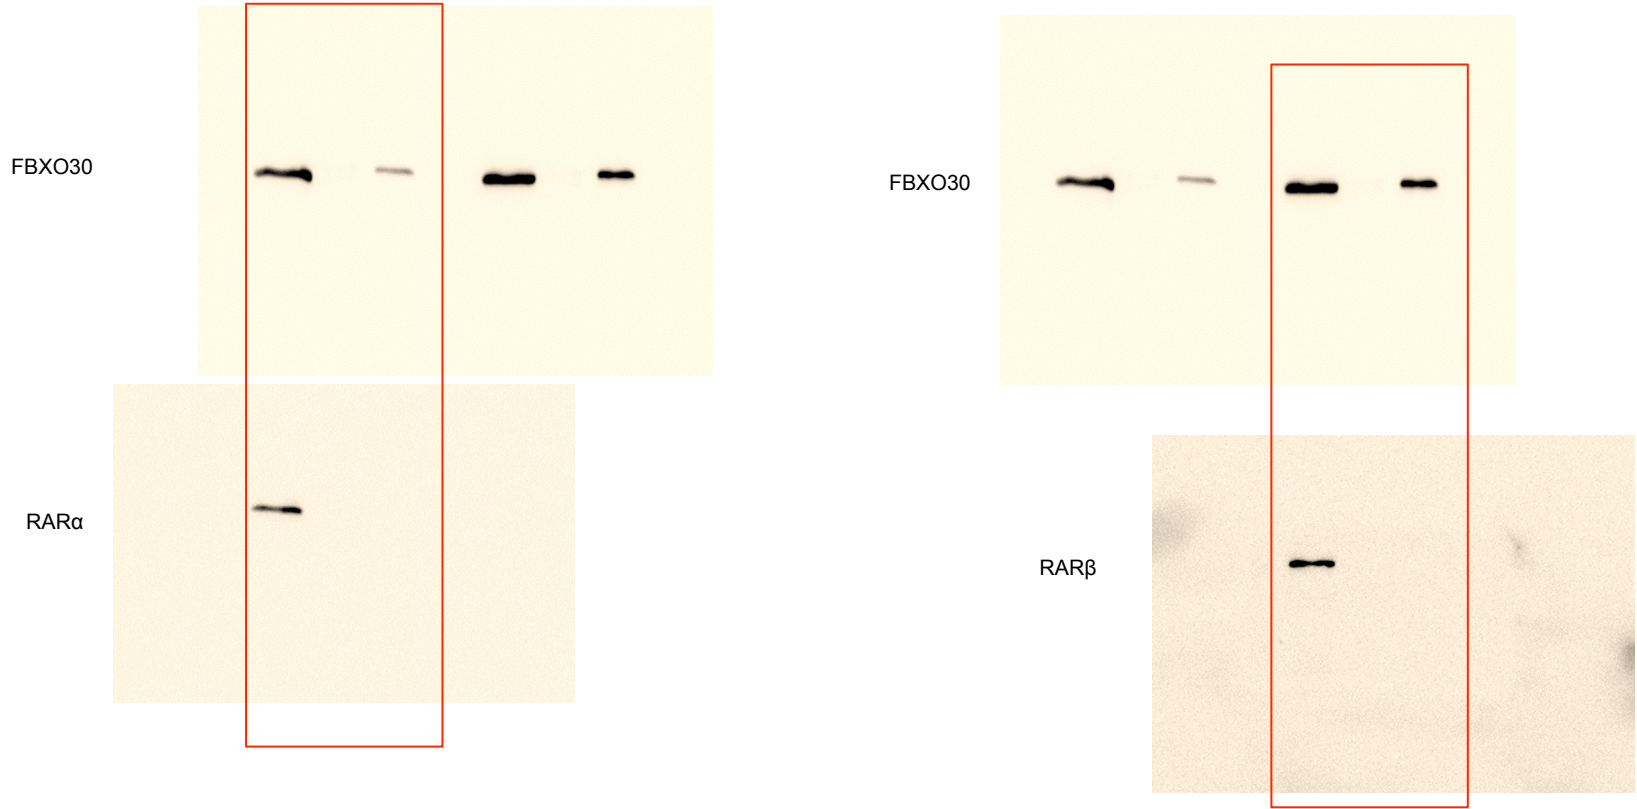

**f**

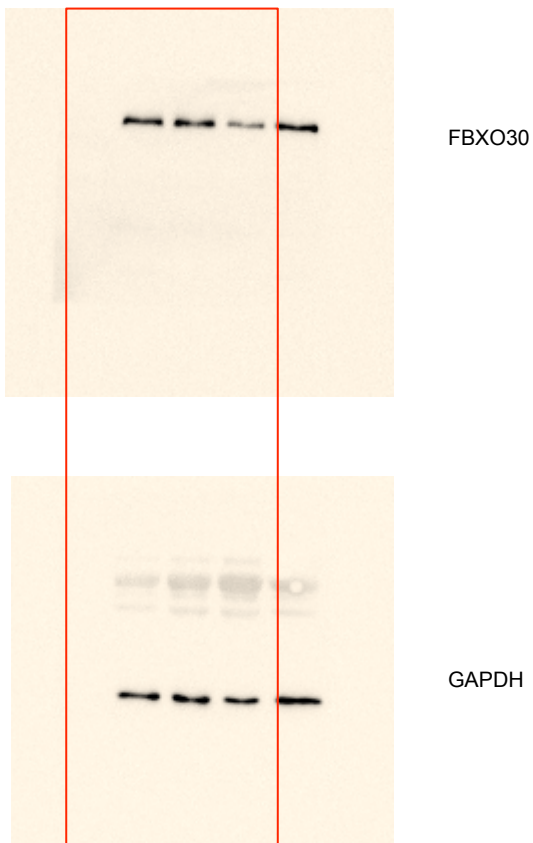

**g**

FBXO30

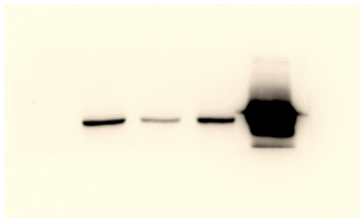

RAR $\alpha$

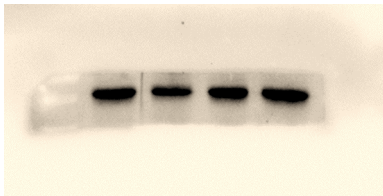

GAPDH

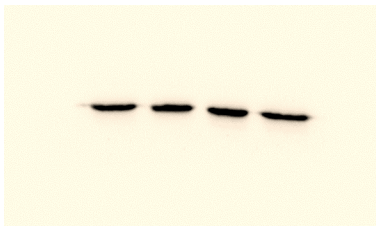

**h**

FBXO30

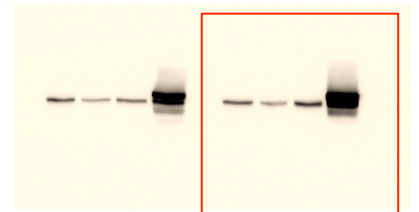

RAR $\beta$

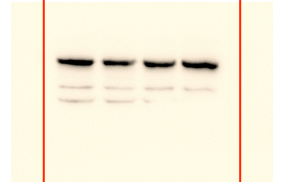

GAPDH

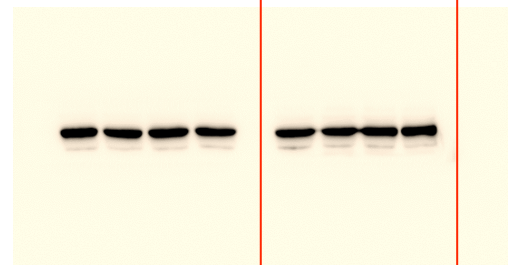

### Supp Figure 3

P-smad1/5

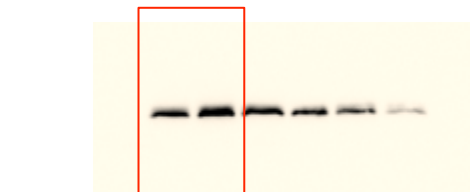

RAR $\gamma$

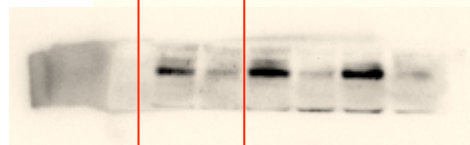

GAPDH

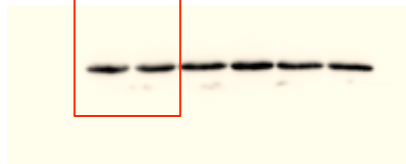

# Supp Figure 4

**a**

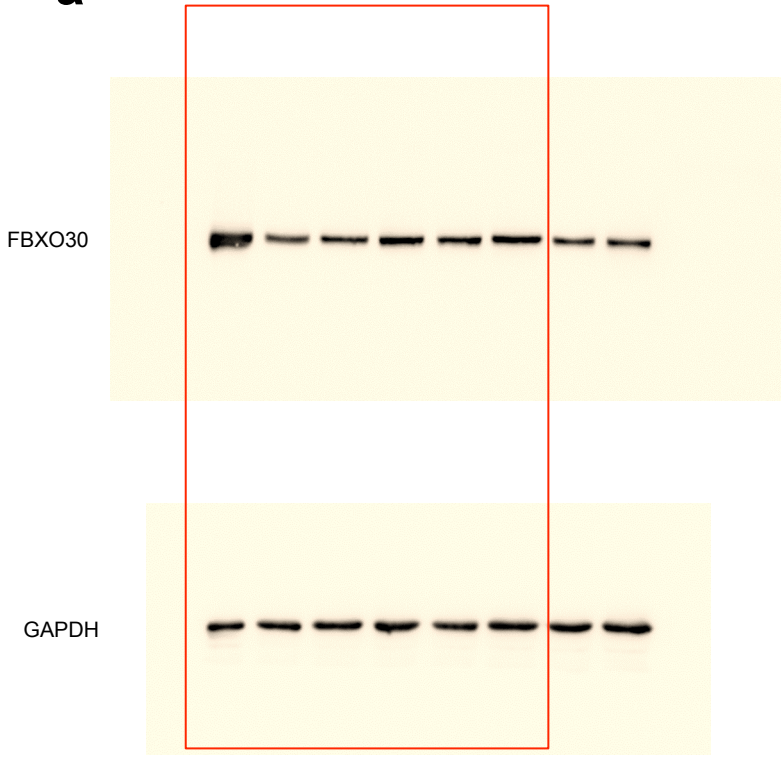

**b**

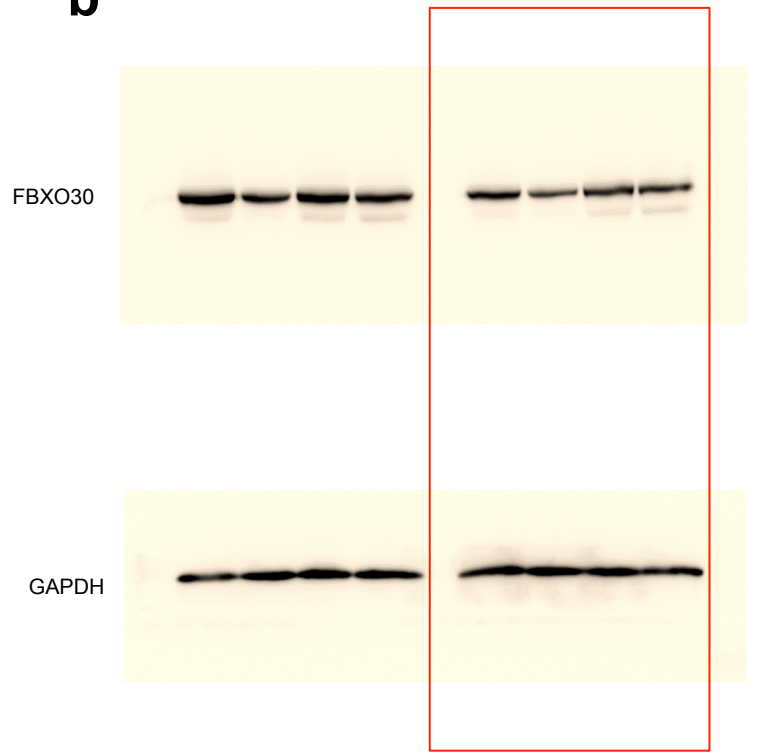

**c**

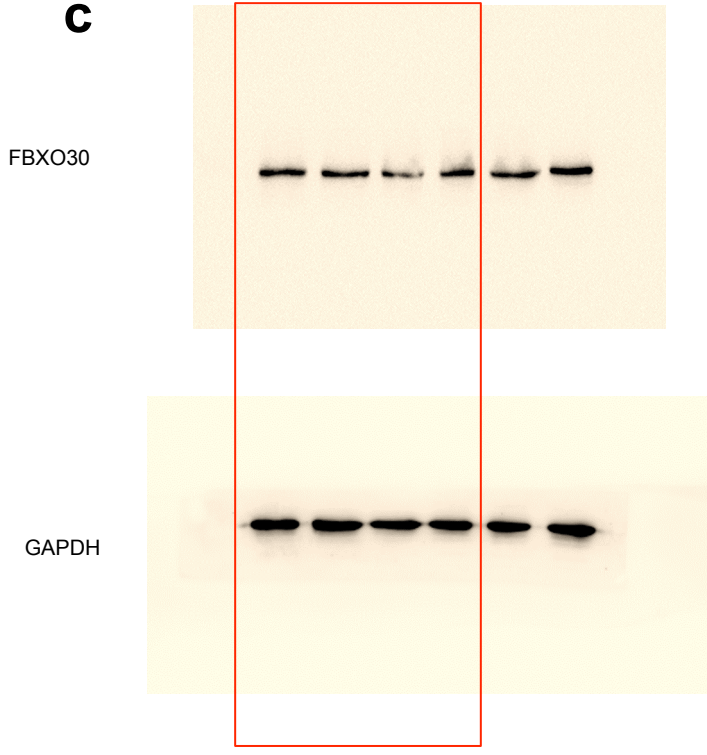

# Supp Figure 5

**a**

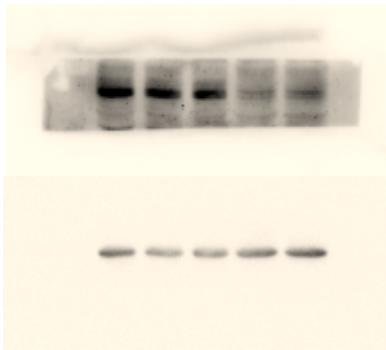

RAR $\gamma$

GAPDH
