# Supplementary material for: F-box protein FBXO30 mediates retinoic acid receptor γ ubiquitination and regulates BMP signaling in neural tube defects
Source: PubMed Central journal article supplement (PMC6639381; doi:10.1038/s41419-019-1783-y), 2019-07-18
Supplement: 41419_2019_1783_MOESM2_ESM.pdf [file 41419_2019_1783_MOESM2_ESM.pdf]

## Supporting information

### S1 Fig

**A** SiRNA-NC vs siRNA-FBXO30 in NT2/D1 cells. Gene Ontology (GO) enrichment analysis for cell component and molecular function of up-regulated proteins. The numbers represent the number of associated proteins for each term. **B** SiRNA-NC vs siRNA-FBXO30 in NT2/D1 cells. Pathway analysis of the DEGs in indicated groups. **C** HEK293 cells were transfected with siRNA FBXO30. Expression of BMP target genes was analyzed by qPCR. All the above data are mean±SD. (n=3), \* $p$ <0.05, by Student's t-test. **D** HEK293 cells were transfected with overexpression of FBXO30. Expression of BMP target genes was analyzed by qPCR. All the above data are mean±s.d. (n=3), \* $p$ <0.05, by Student's t-test

### S2 Fig

**A-C** Mass spectrometry of RAR $\gamma$  interacting proteins in HEK293 cells. The interactions between RAR $\gamma$  and FBXO30 were shown to indicate the dynamic alterations. **D** The whole HEK293 cell extract were immunoprecipitated with anti-RAR $\alpha$  or anti-RAR $\beta$  antibody and Normal rabbit IgG antibody, and analyzed by western blot with anti-FBXO30 and anti-RAR $\alpha$  or anti-RAR $\beta$ . **E** The colocalization of FBXO30 and RAR $\gamma$  in the NT2/D1 cells. Direct immunofluorescence analysis was performed. Images were captured by confocal microscope and the nuclei were stained with DAPI. Scale bars, 22 $\mu$ m. **F** FBXO30 siRNA or NC (negative control) were used to infect HEK293 cells. Knockdown of FBXO30 was detected by immunoblotting and RT-PCR. **G** Overexpression of FBXO30 or knockdown of endogenous FBXO30 in HEK293 cells. Endogenous FBXO30 and RAR $\alpha$  or RAR $\beta$  expression was analyzed by western blot

### **S3 Fig**

**A** Knock down endogenous RAR $\gamma$  in HEK293 cells, the expression of p-Smad1/5 was detected by western blotting. **B** siRNA-FBXO30 or siRNA-control was transfected into NT2/D1 cells. Direct visualization or indirect immunofluorescence was performed. Scale bars, 22 $\mu$ m.

### **S4 Fig**

**A** NT2/D1 cells were treated with RA (1  $\mu$ M, 12h) or Cisplatin (100 $\mu$ mol/L) or MTX (1 $\mu$ M) for the indicated times. Cell lysates were harvested to detect FBXO30 level (left). Real-time PCR analysis showed no effect of RA on FBXO30 mRNA level (right). Mean values and SD are depicted. **B** NT2/D1 cells were treated with RA 12h for the indicated concentration. Cell lysates were harvested to detect FBXO30 level. **C** NT2/D1 cells were treated with RA (1  $\mu$ M) for the indicated time. Cell lysates were harvested to detect FBXO30 level. **D** NT2/D1 cells were treated with RA (1  $\mu$ M) for 12h. Direct visualization or indirect immunofluorescence was performed.

### **S5 Fig**

**A** HEK293 cells were transfected siRNA RAR $\gamma$ . Thirty-six hours after transfection, BRE luciferase activity was measured after treatments with BMP-2 (100 ng/ml) and/or RA (1 $\mu$ M) for 12 h. Data are mean $\pm$ s.d. (n=3). **B** siRNA-FBXO30 or siRNA-normal transfected in NT2/D1 cells as indicated. Thirty-six hours after transfection, cells were stimulated with BMP-2 and/or RA for 12 h before harvesting. Direct visualization or indirect immunofluorescence was performed. Scale bars, 22 $\mu$ m.

**S6 Fig**

**A** Representative images from immunohistochemical staining of FBXO30 and pSmad1/5 in the affect area of cranial neural tissue from E10.5. **B** FBXO30 and pSmad1/5 expression scores are shown as box plots, with the horizontal lines representing the median. Data are mean±s.d. (n=3), \*p<0.05, by Student's t-test.

**S7 Fig**

The mRNA expression of BMP related Genes in the brain of NTD fetuses, determined by Nano String. Data are mean±s.d. (n=10), \*p<0.05, by Student's t-test.
